# Supplementary figures and images for: Whole-body kinematics of a fruit bat reveal the influence of wing inertia on body accelerations
Source: Oxford University Press journal article supplement (doi:10.1242/jeb.037804), 2011-04-13

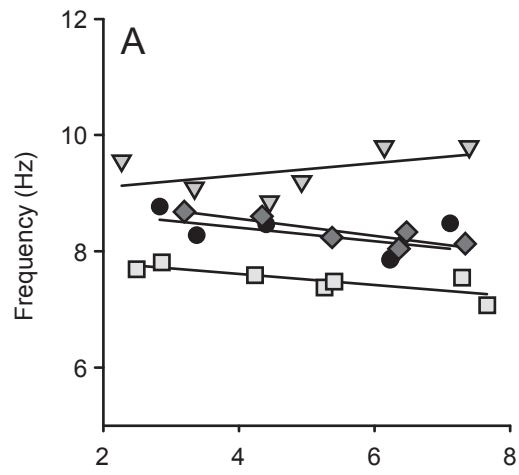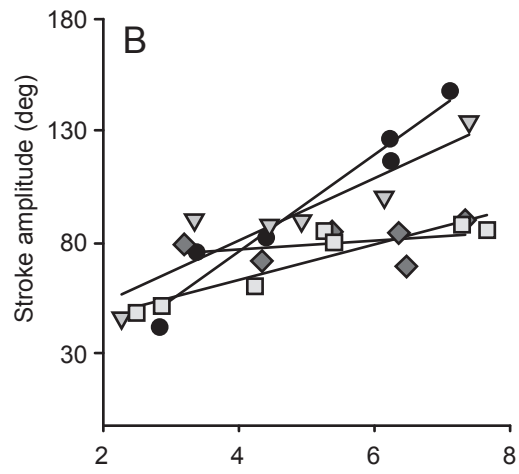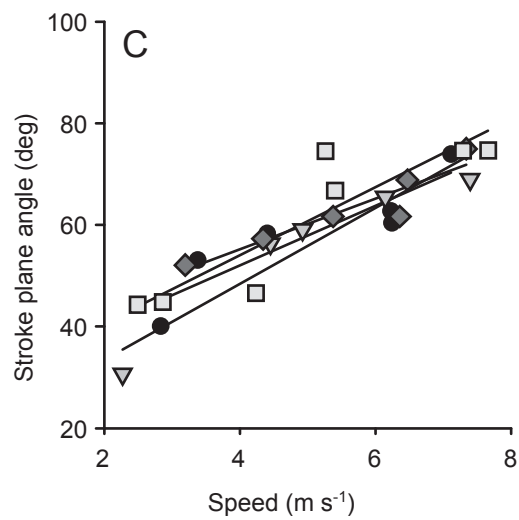

Supplement: jeb037804figs1.pdf [file jeb037804figs1.pdf]

DOWNSTROKE

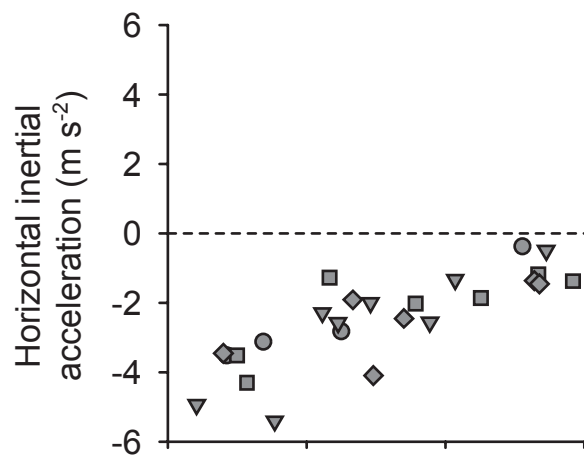

UPSTROKE

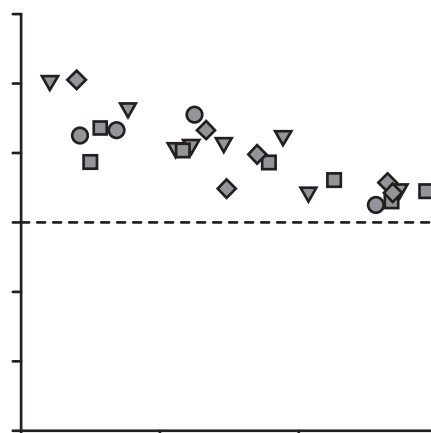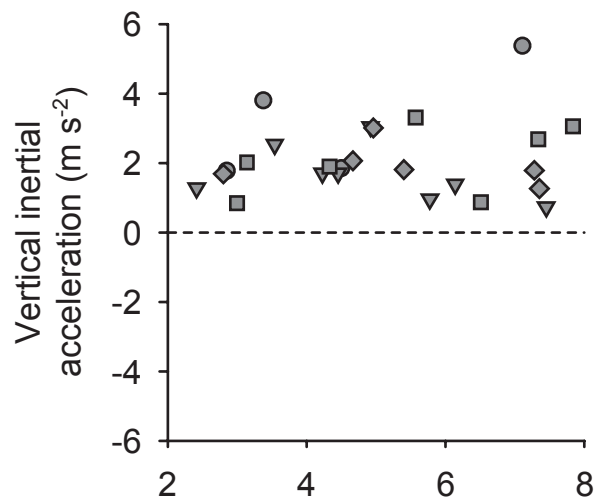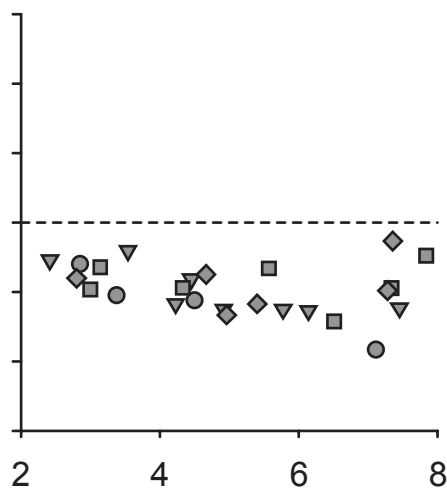Speed ( $\text{m s}^{-1}$ )

Supplement: jeb037804figs2.pdf [file jeb037804figs2.pdf]
